# Supplementary material
Source: publisher site journal article supplement (https://www.dovepress.com/article/452896)
Supplement: Supplementary file 1 [file get_supplementary_file.php]

## Supplementary information

### **Ionizable lipid nanoparticle-mediated TRAIL mRNA delivery in the tumor microenvironment to inhibit colon cancer progression**

Walison Nunes da Silva<sup>1</sup>, Pedro Augusto Carvalho Costa<sup>1</sup>, Sérgio Ricardo Aluotto Scalzo Júnior<sup>1</sup>, Heloísa Athaydes Seabra Ferreira<sup>1</sup>, Pedro Henrique Dias Moura Prazeres<sup>2</sup>, Caroline Leonel Vasconcelos<sup>3</sup>, Marco Túllio Rodrigues Alves<sup>1</sup>; Natália Jordana Alves da Silva<sup>1</sup>, Ana Luiza de Castro Santos<sup>1</sup>, Lays Cordeiro Guimarães<sup>1</sup>, Maria Eduarda Chen Ferris<sup>1</sup>, Ajay Thatte<sup>4</sup>, Alex Hamilton<sup>4</sup>, Kelly Alves Bicalho<sup>5</sup>, Anderson Oliveira Lobo<sup>6</sup>, Helton da Costa Santiago<sup>3</sup>, Lucíola da Silva Barcelos<sup>1</sup>, Maria Marta Figueredo<sup>7</sup>, Mauro Martins Teixeira<sup>3</sup>, Vivian Vasconcelos Costa<sup>8</sup>, Michael J. Mitchell<sup>4</sup>, Frédéric Frezard<sup>1</sup>, Pedro Pires Goulart Guimaraes<sup>1#</sup>.

<sup>1</sup>Department of Physiology and Biophysics, Federal University of Minas Gerais, Belo Horizonte, MG, Brazil.

<sup>2</sup>Department of Pathology, Federal University of Minas Gerais, Belo Horizonte, MG, Brazil.

<sup>3</sup>Department of Biochemistry and Immunology, Federal University of Minas Gerais, Belo Horizonte, MG, Brazil.

<sup>4</sup>Department of Bioengineering, University of Pennsylvania, Philadelphia, PA, USA.

<sup>5</sup>Instituto René Rachou, Fundação Oswaldo Cruz, Belo Horizonte, MG, Brazil.

<sup>6</sup>Department of Materials Engineering, Federal University of Piauí, Teresina, PI, Brazil.

<sup>7</sup>State University of Minas Gerais, Divinópolis, MG, Brazil.

<sup>8</sup>Department of Morphology, Federal University of Minas Gerais, Belo Horizonte, MG, Brazil.

#Corresponding author: Pedro Pires Goulart Guimaraes, Department of Physiology and Biophysics, Federal University of Minas Gerais, Belo Horizonte, MG, Brazil, Email: ppresgo@reitoria.ufmg.br

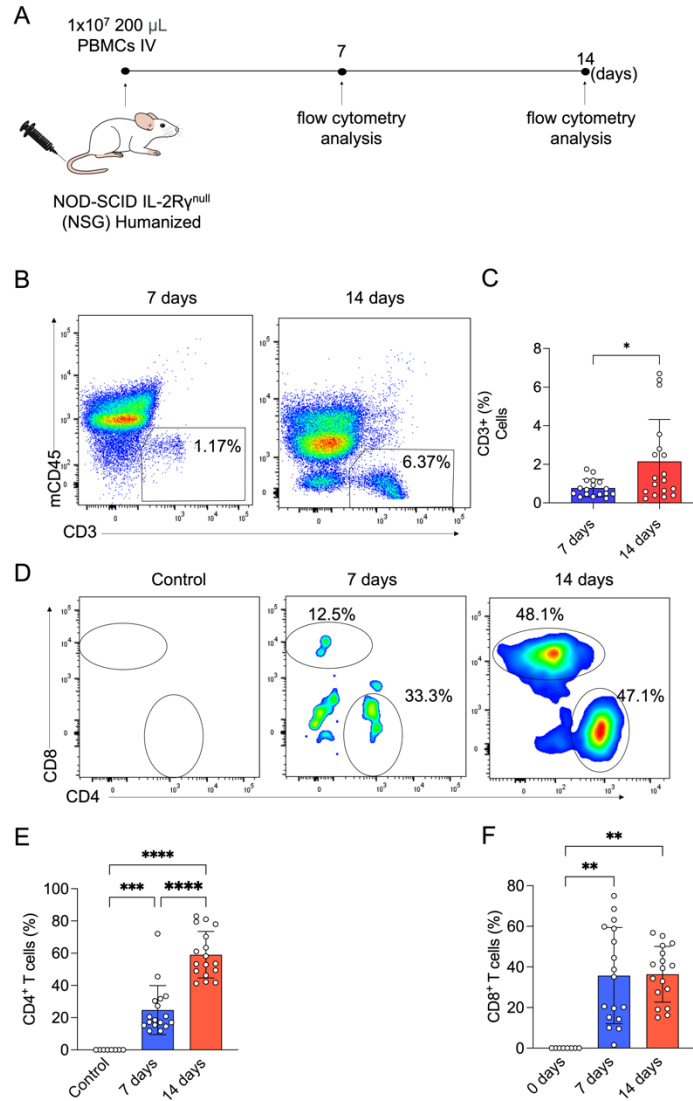

**Fig. S1: Establishment of humanized mice from human peripheral blood mononuclear cells (PBMCs).** (A) Schematic representation of the humanization of NSG mice by transplantation of PBMCs. NSG mice were humanized by intravenously injecting  $10^7$  PBMCs in a volume of 200  $\mu$ L. Humanization rate analysis was conducted at 7 days and 14 days post-transplantation to evaluate the level of human cell engraftment. (B) Gating strategy for human CD3+ cells and lymphocytes ( $n = 17$ -18 samples/group). (C) Frequency quantification of human CD3+/mCD45- cells in the peripheral blood of humanized NSG mice 7 days and 14 days post-humanization. (D) Gating strategy for human lymphocytes. Frequency quantification of human (E) CD4+ T and (F) CD8+ T cells in the peripheral blood of NSG mice 7 days and 14 days post-humanization ( $n = 8$ -17 samples/group). Data are presented as mean  $\pm$  SD. Unpaired t-test (\* $p < 0.05$ ; \*\*  $p < 0.01$ ; \*\*\*  $p < 0.001$  and \*\*\*\*  $p < 0.0001$ ).

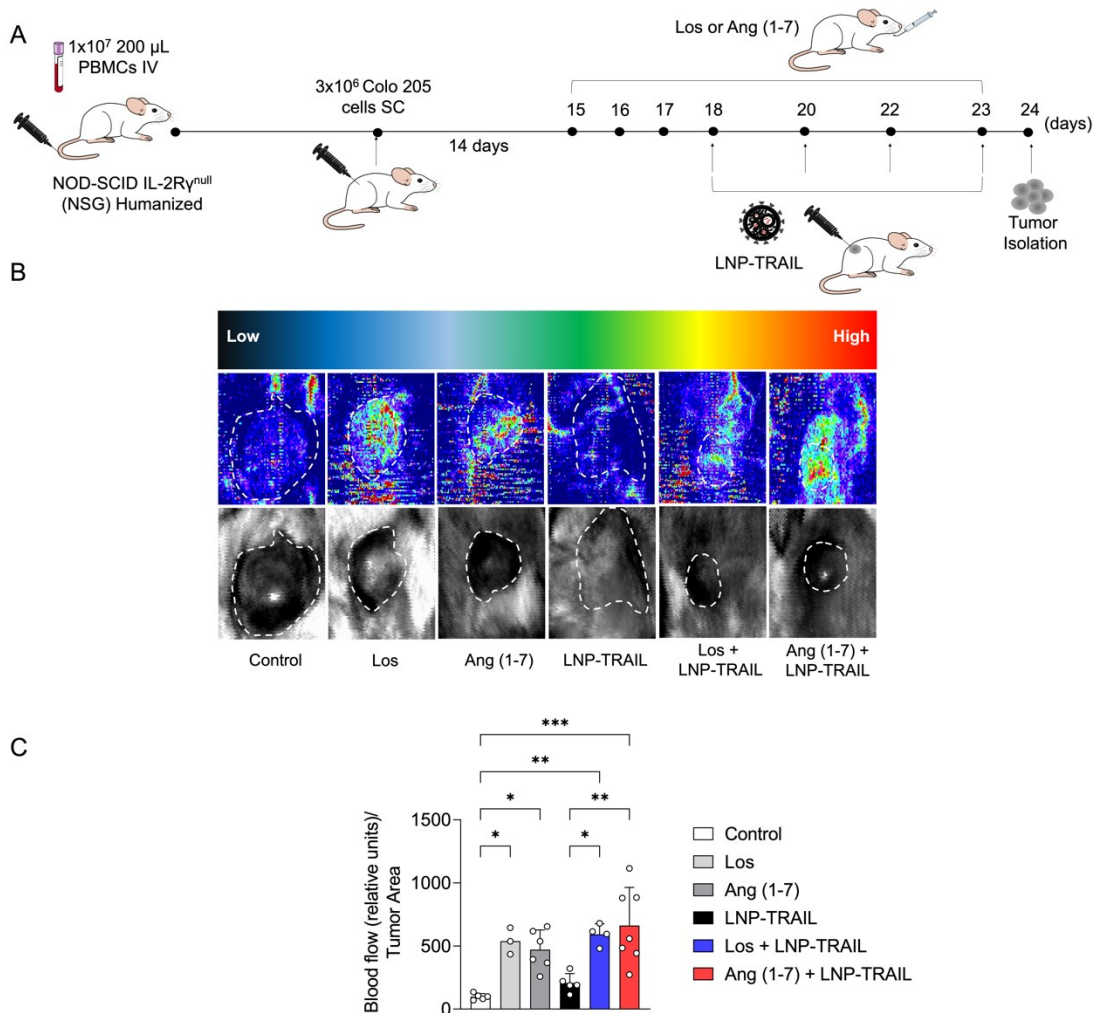

**Fig. S2: TME normalization increases blood flow in humanized NSG mice. (A)** Schematic representation of NSG mice humanization and subcutaneous Colo 205 tumor cells transplantation following treatments with Los, Ang (1-7), and LNP-TRAIL. **(B)** Representative blood flow images in tumor tissue 24 days post-treatment. Warmer colors represent higher perfusion levels, while the dashed area denotes the tumor region. **(C)** Quantification of blood flow in tumor tissues of humanized mice 24 days post-treatment (n = 3-7/group). Data are presented as mean  $\pm$  SD. One-way ANOVA followed by Tukey's multiple comparison test (\* p < 0.05; \*\* p < 0.01; \*\*\* p < 0.001).

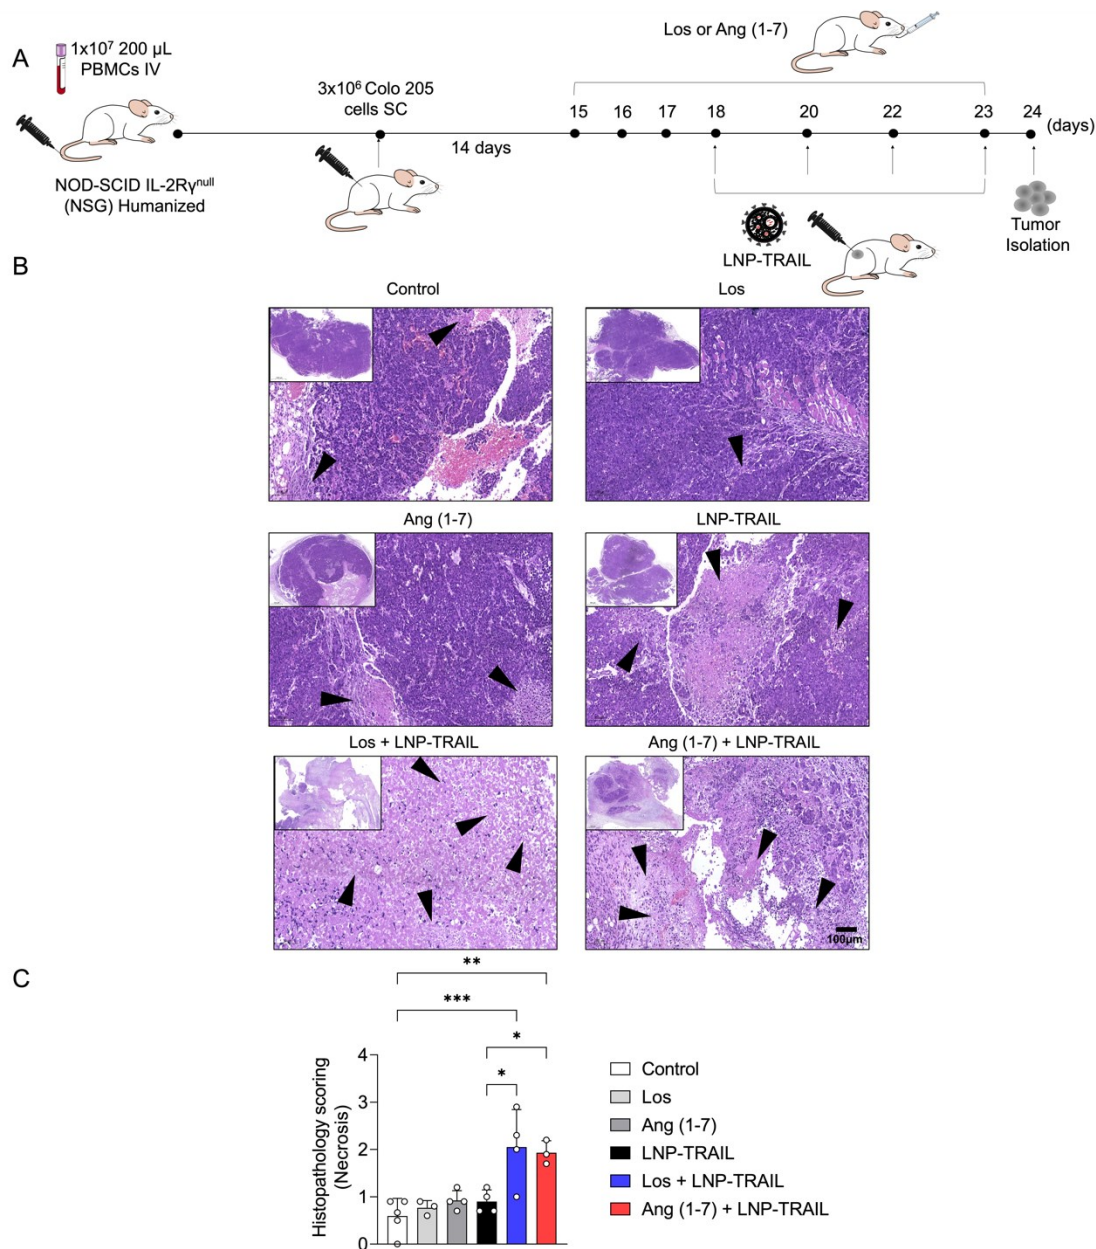

**Fig. S3. LNP-TRAIL combined with TME normalization increases the area of necrosis tumoral.** (A) Schematic representation of NSG mice humanization and subcutaneous Colo 205 tumor cells transplantation following treatments with Los, Ang (1-7), and LNP-TRAIL. (B) Tumor sections were stained with hematoxylin and eosin (H&E). Histopathological analysis at 40× magnification. Black arrows indicate the area of tumor necrosis. (C) Histopathology scoring (necrosis) in humanized mice treated with LNP-TRAIL combined with TME normalization (n = 3-5 samples/group). Data are presented as mean ± SD. One-way ANOVA followed by Tukey's multiple comparison test (\* p < 0.05; \*\* p < 0.01; \*\*\* p < 0.001).

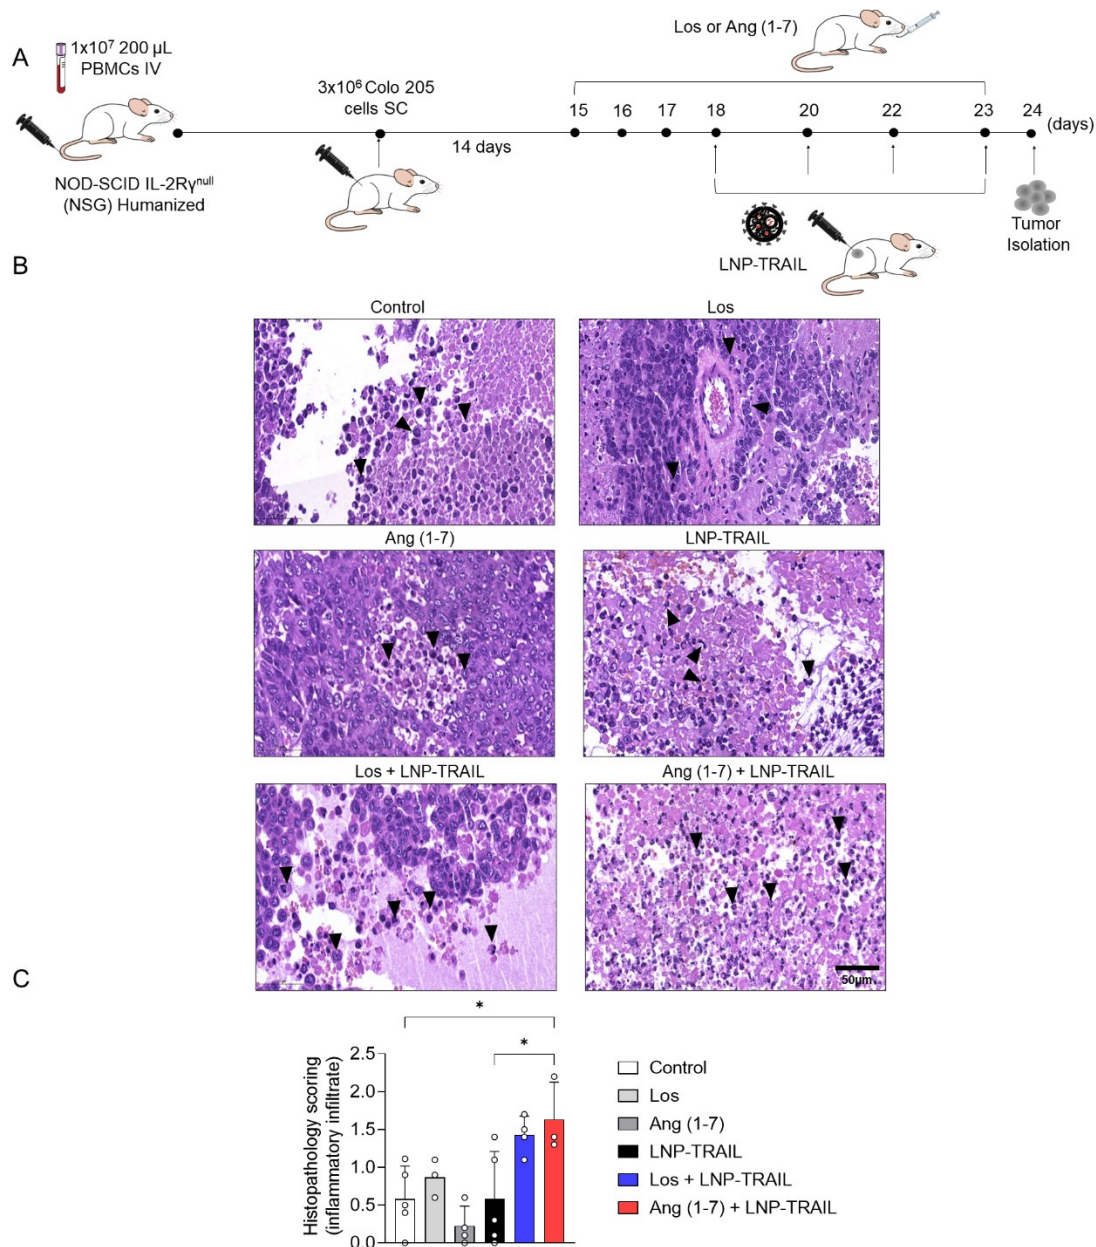

**Fig. S4: TME normalization increases the inflammatory infiltrate. (A)** Schematic representation of NSG mice humanization and subcutaneous Colo 205 tumor cells transplantation following treatments with Los, Ang (1-7), and LNP-TRAIL. **(B)** Tumor tissues stained with hematoxylin and eosin (H&E). Histopathological analysis at 40 $\times$  magnification, with black arrows indicating the immune cell infiltrate. **(C)** Histopathology scoring (inflammatory infiltrate) in humanized mice treated with LNP-TRAIL combined with Los or Ang (1-7) ( $n = 3-5$  samples/group). Data are presented as mean  $\pm$  SD. One-way ANOVA followed by Tukey's multiple comparison test (\*  $p < 0.05$ ).

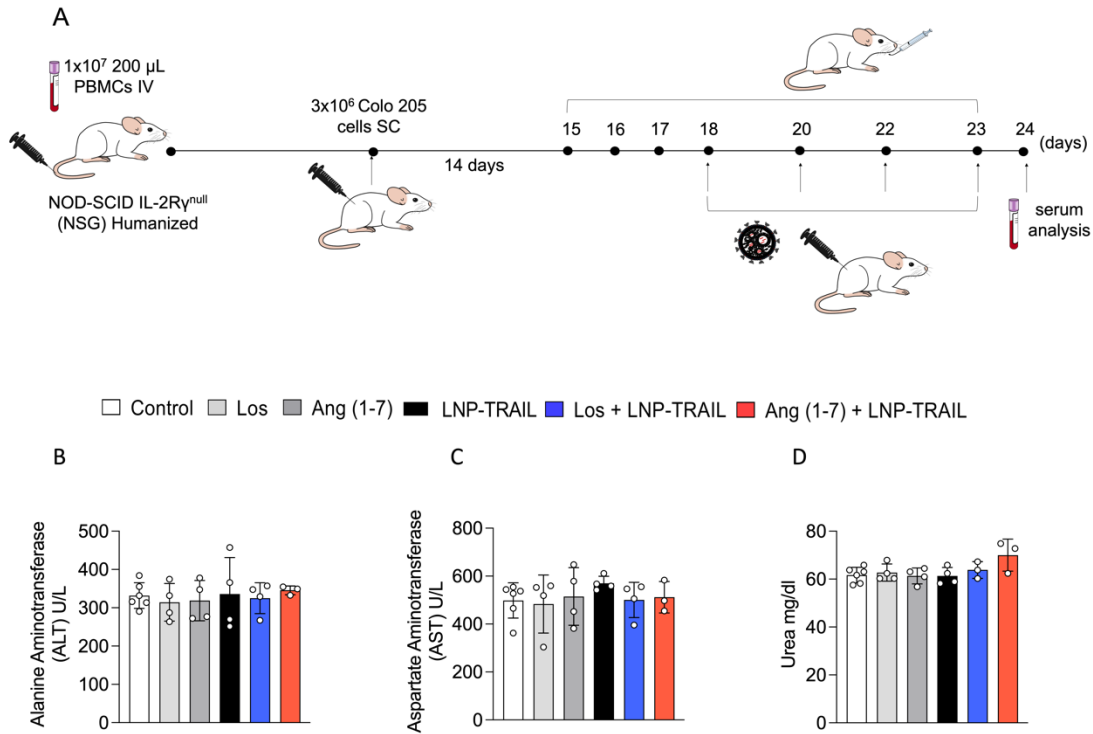

**Fig. S5: The administration of LNP-TRAIL does not impact liver and kidney function.** (A) Schematic representation of NSG mice humanization and subcutaneous Colo 205 tumor cells transplantation following treatments with Los, Ang (1-7), and LNP-TRAIL. (B) Alanine Transaminase (ALT) (C) and Aspartate Transaminase (AST) levels measured in (U/mL), along with (D) Urea levels measured in (mg/dL) (n = 4-6 samples/group). Data are presented as mean  $\pm$  SD. Statistical analysis was conducted using one-way ANOVA followed by Tukey's multiple comparison test.

**Table S1. Antibodies list for flow cytometry**

| <b>Antigen</b> | <b><u>Fluorochrome</u></b> | <b>Clone</b>    | <b>Concentration</b> | <b>Company</b> |
|----------------|----------------------------|-----------------|----------------------|----------------|
| CD3            | Super Bright 645           | OKT3            | 1/100                | ThermoFisher   |
| CD8a           | eFluor 450                 | RPA-TB          | 1/100                | ThermoFisher   |
| CD4            | Super Bright 600           | RPA-T4          | 1/1000               | ThermoFisher   |
| LIVE/DEAD      | Acqua                      |                 | 1/1000               | ThermoFisher   |
| CD253          | PE                         | RIK-2           | 1/100                | ThermoFisher   |
| Hu-CD45RO      | PE-eFluor 610              | UCHL1           | 1/100                | ThermoFisher   |
| mCD45          | Pacific Orange             | 30-F11          | 1/200                | ThermoFisher   |
| Ki67           | AlexaFluor 700             | SolA15          | 1/100                | ThermoFisher   |
| PD-1           | PE-Cyanine7                | EBioJ105 (J105) | 1/100                | ThermoFisher   |
| CTLA-4         | APC-eFluor 780             | 14D3            | 1/100                | ThermoFisher   |
